# Supplementary material for: GADD45γ induces G2/M arrest in human pharynx and nasopharyngeal carcinoma cells by cucurbitacin E
Source: PubMed Central journal article supplement — Sci Rep. 2014 Sep 23;4:6454. doi: 10.1038/srep06454 (PMC4171705; doi:10.1038/srep06454), 2014-09-23
Supplement: srep06454-s1.pdf [file srep06454-s1.pdf]

**GADD45 induces G2/M arrest in human pharynx and  
nasopharyngeal carcinoma cells by cucurbitacin E**

Chao-Ming Hung<sup>1\*</sup>, Chi-Chang Chang<sup>2</sup>, Chen-Wei Lin<sup>3,4</sup>, Chih-Chen Chen<sup>2</sup> and Yi-Chiang Hsu<sup>3,4\*</sup>

<sup>1</sup>Department of General Surgery, E-Da Hospital, I-Shou University, 82445, Kaohsiung,  
Taiwan,

<sup>2</sup>Department of Obstetrics & Gynecology, E-Da Hospital, E-Da Hospital/I-Shou  
University, 82445, Kaohsiung, Taiwan.

<sup>3</sup>Graduate Institute of Medical Science, College of Health Sciences, Chang Jung  
Christian University, 71101, Tainan, Taiwan,

<sup>4</sup>Innovative Research Center of Medicine, College of Health Sciences, Chang Jung  
Christian University, 71101, Tainan, Taiwan,

Corresponding author:

Yi-Chiang Hsu. (YC Hsu)

E-mail: [d8702008@tmu.edu.tw](mailto:d8702008@tmu.edu.tw) or [jenway@mail.cjcu.edu.tw](mailto:jenway@mail.cjcu.edu.tw)

Tel: +886-6-278-5123 ext 3011

Fax: +886-6-278-5663

Supplementary figures and tables

Figure. S1

(A) Detroit 562 cells

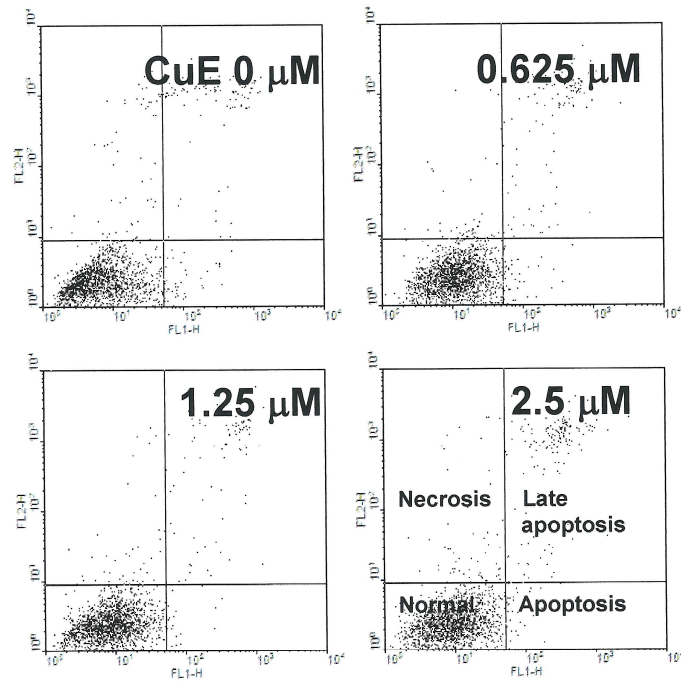

(B) Hone-1 cells

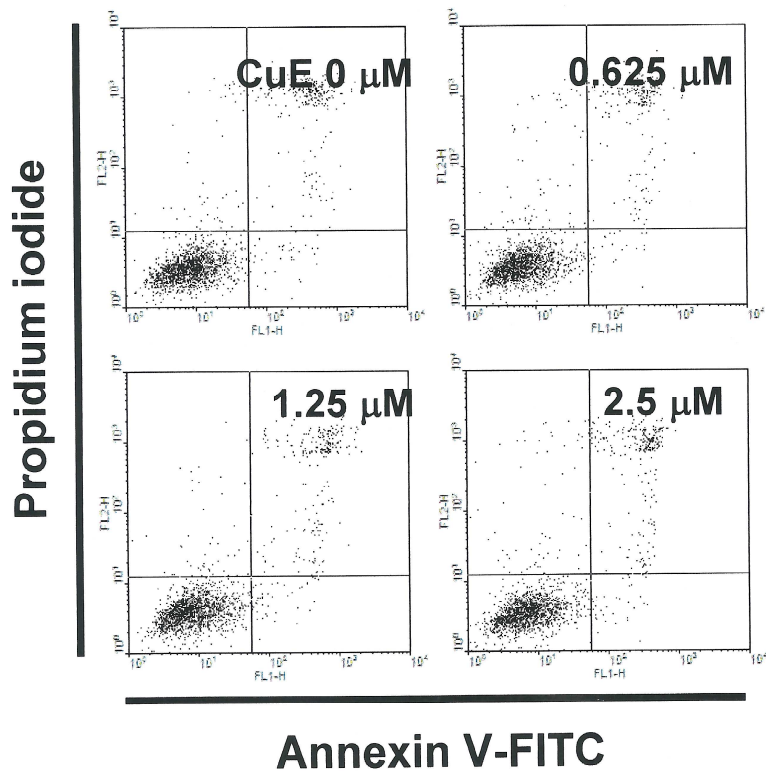

Figure. S1

(C)

Detroit 562 cells

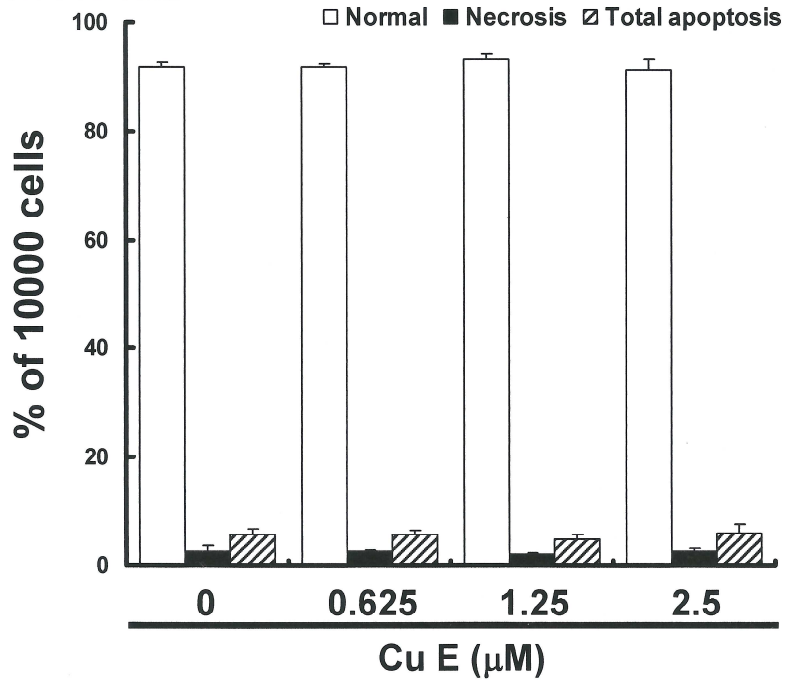

Hone-1 cells

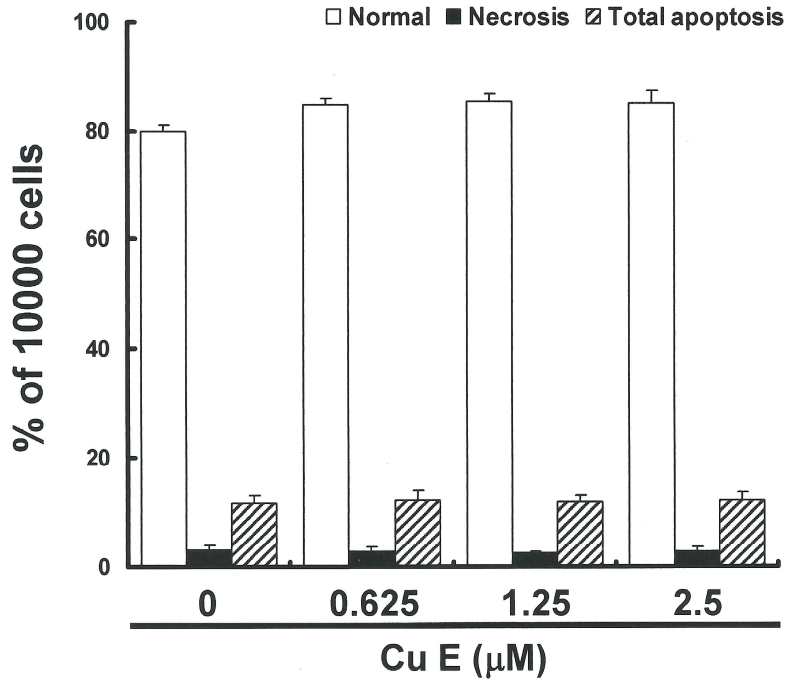

Figure. 1S- (A and B) Influence of CuE on apoptosis/necrosis in NPC cell lines. (C)

Total apoptosis and necrosis in NPC cell lines after 4 h of incubation with CuE.

Results were expressed as a percentage of the total number of apoptotic cells  
(early and late apoptosis)

**Figure. S2**

**(A) Detroit 562 cells**

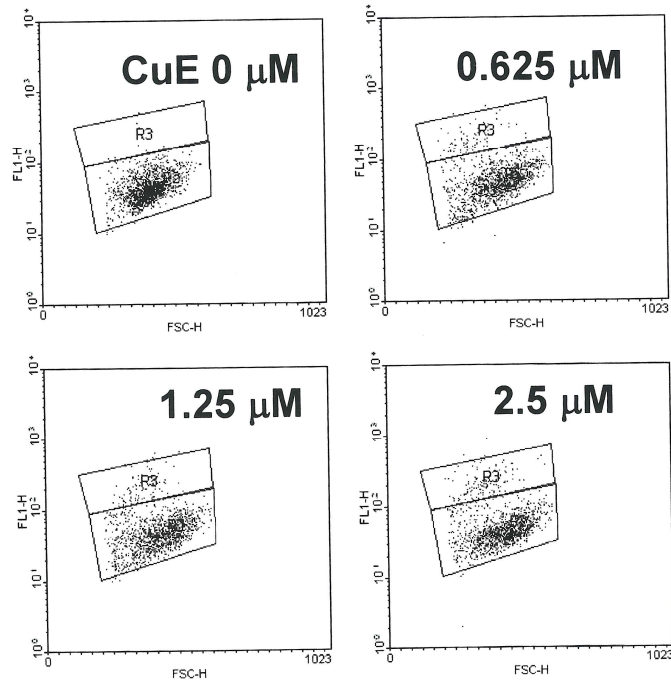

**(B) Hone-1 cells**

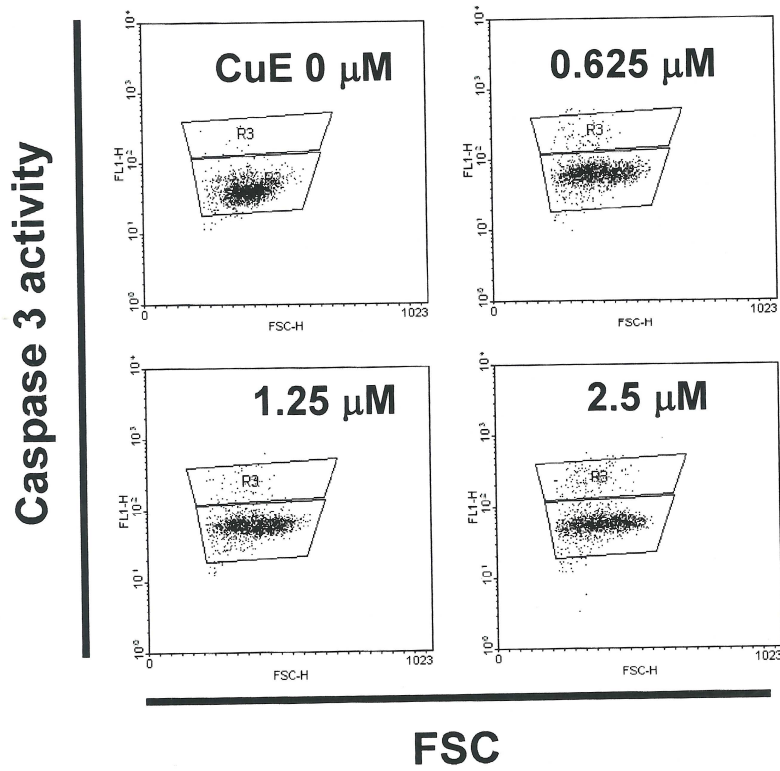

**Figure. S2**

(C)

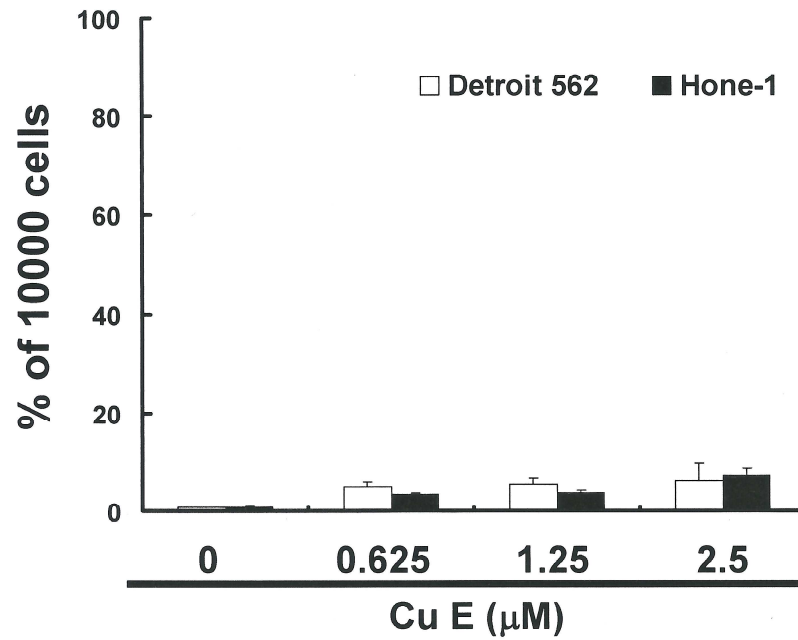

**Figure. 2S-** Caspase-3 activity in NPC cell lines by CuE 24 h treatment. (A and B)

The cells were treated with CuE (0, 0.625, 1.25 and 2.5  $\mu\text{M}$ ) for 24 h.

Following treatment, the cells were harvested and labeled using FITC rabbit anti-active caspase-3. Activation was quantified by flow cytometry. (C)

Quantification by flow cytometry. All data was reported as the mean ( $\pm\text{SEM}$ )

of at least three separate experiments.

Figure. S3

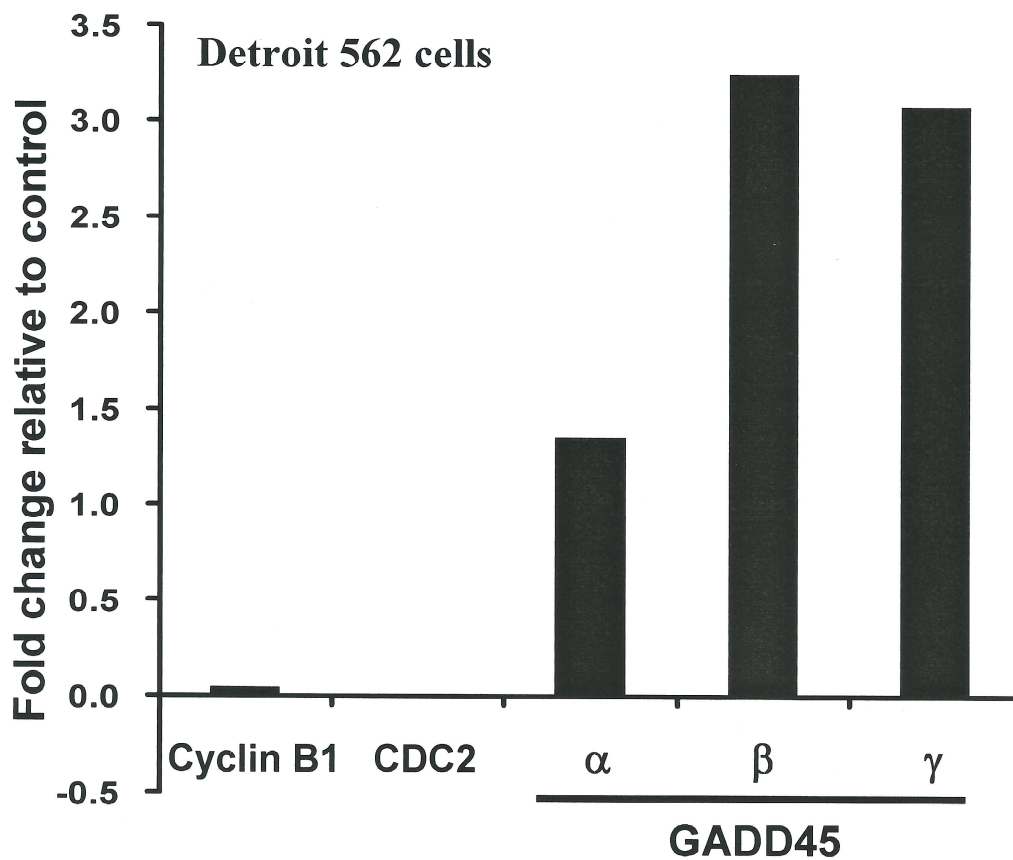

**Figure. 3S-** The genes downregulated or upregulated in Detroit 562 cells following exposure to CuE. The cyclin B1, CDC2 and GADD45- $\alpha$ , - $\beta$ , - $\gamma$  gene expression profile was studied in Detroit 562 cells exposed for 4 hours to the vehicle (DMSO) or to the CuE 5 $\mu$ M.

Figure. S4

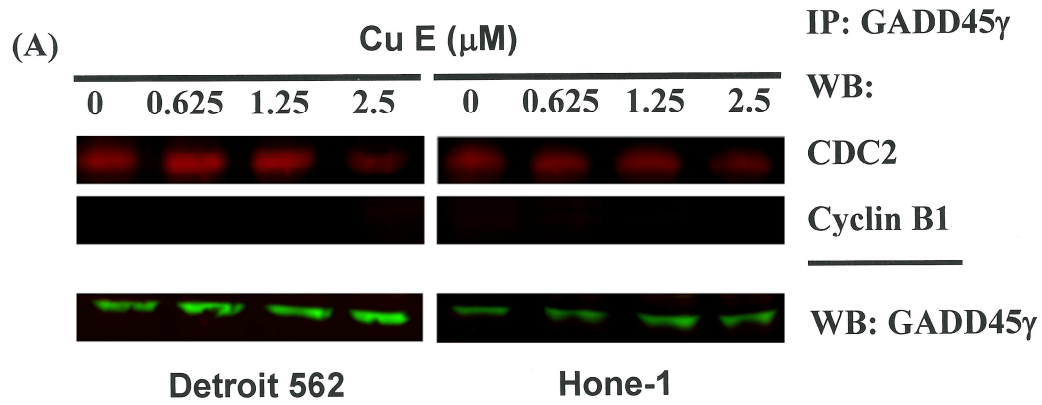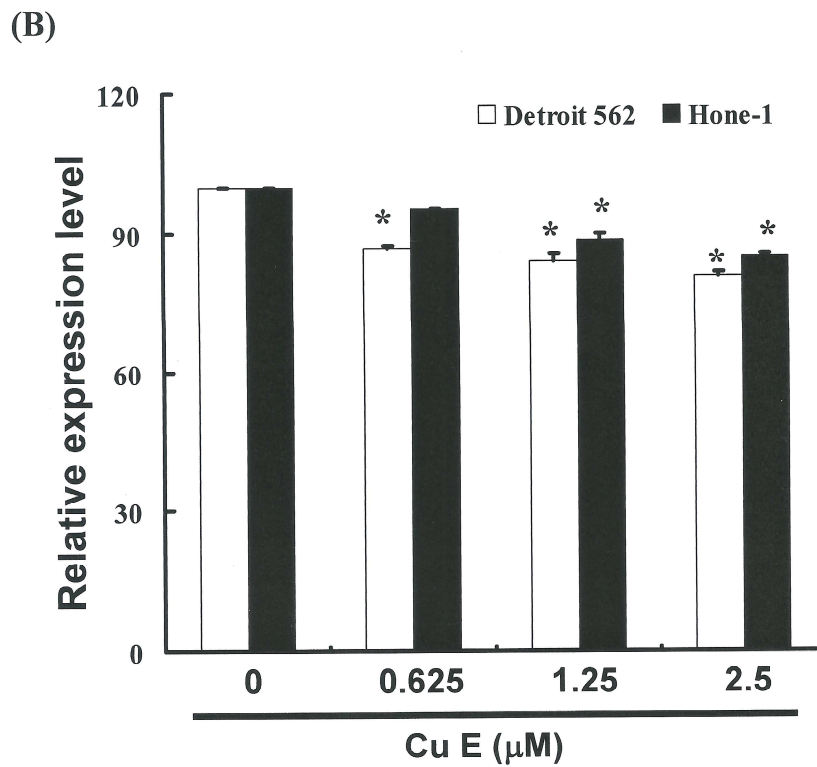

**Figure. 4S-** CuE induced the GADD45 $\gamma$ /CDC2 complex in Detroit 562 and HONE-1

cells. The cells were treated with CuE (0, 0.625, 1.25 and 2.5  $\mu$ M) for 24 h and GADD45 $\gamma$ /cyclin B1 and GADD45 $\gamma$ /CDC2 complex were subsequently detected by Co-IP analysis. (A) Co-IP and western blotting representative blot



from 3 independent experiments. (B) Quantification of band intensities. All data was reported as the mean ( $\pm$ SEM) of at least three separate experiments. Statistical analysis was performed using a t-test, with significant differences determined at the level of  $*P < 0.05$  versus 0  $\mu$ M control group.

**Table S1. KEGG pathways of the genes up- or down regulated in Detroit 562 cells following exposure to CuE (1.25  $\mu$  M)**

| Rank | Pathway                                       | PValue |
|------|-----------------------------------------------|--------|
| 1    | hsa04010:MAPK signaling pathway               | 0.000  |
| 2    | hsa05200:Pathways in cancer                   | 0.000  |
| 3    | hsa05217:Basal cell carcinoma                 | 0.000  |
| 4    | hsa04530:Tight junction                       | 0.001  |
| 5    | hsa04115:p53 signaling pathway                | 0.002  |
| 6    | hsa04340:Hedgehog signaling pathway           | 0.002  |
| 7    | hsa04670:Leukocyte transendothelial migration | 0.010  |
| 8    | hsa04012:ErbB signaling pathway               | 0.010  |

The genome-wide gene expression profile was studied on whole human genome SurePrint G3 arrays array in Detroit 562 cells following a 4 hour-exposure to vehicle (DMSO) or to the CuE. By importing the complete list of Entrez Gene IDs or down- or up-regulated genes into KEGG pathways related to the set of imported showing  $p < 0.01$  by a modified Fisher Exact test were identified. The pathways are listed with the category and p-value.

**Table S2. Top 10 genes down-regulated in Detroit 562 cells following exposure to CuE (1.25  $\mu$  M)**

Down-regulated Genes (n=431)

| Gene Name    | Fold Change | Gene bank    | Description                                                                |
|--------------|-------------|--------------|----------------------------------------------------------------------------|
| LOC644578    | -160.256    | XM_001715474 | PREDICTED: Homo sapiens similar to hCG2040199                              |
| A2ML1        | -58.431     | NM_144670    | Homo sapiens alpha-2-macroglobulin-like 1                                  |
| ZNF610       | -50.664     | NM_173530    | Homo sapiens zinc finger protein 610 (ZNF610)                              |
| OLFM1        | -49.048     | NM_006334    | Homo sapiens olfactomedin 1 (OLFM1)                                        |
| LOC441687    | -35.381     | XM_001717077 | PREDICTED: Homo sapiens similar to testis expressed gene 21 (LOC441687)    |
| ERC2         | -23.038     | NM_015576    | Homo sapiens ELKS/RAB6-interacting/CAST family member 2 (ERC2)             |
| UGT2A3       | -21.452     | NM_024743    | Homo sapiens UDP glucuronosyltransferase 2 family, polypeptide A3 (UGT2A3) |
| AOX2P        | -18.980     | NR_001557    | Homo sapiens aldehyde oxidase 2 pseudogene (AOX2P)                         |
| LOC100128354 | -18.234     | NR_001557    | Homo sapiens aldehyde oxidase 2 pseudogene (AOX2P)                         |
| NRARP        | -15.898     | NM_001004354 | Homo sapiens NOTCH-regulated ankyrin repeat protein (NRARP)                |

**Table S3. Top 10 genes up-regulated in Detroit 562 cells following exposure to CuE (1.25  $\mu$  M)**

Up-regulated Genes (n=941)

| Gene Name | Fold Change | Gene bank    | Description                                                                              |
|-----------|-------------|--------------|------------------------------------------------------------------------------------------|
| KIAA1239  | 85.405      | NM_001144990 | Homo sapiens KIAA1239 (KIAA1239)                                                         |
| LOC285556 | 77.931      | XM_373030    | Homo sapiens hypothetical protein LOC285556                                              |
| ATF3      | 45.129      | NM_001040619 | Homo sapiens activating transcription factor 3 (ATF3)                                    |
| BACH2     | 35.593      | NM_021813    | Homo sapiens BTB and CNC homology 1, basic leucine zipper transcription factor 2 (BACH2) |
| MYLK      | 35.561      | NM_053025    | Homo sapiens myosin light chain kinase (MYLK)                                            |
| CHAC1     | 33.970      | NM_024111    | Homo sapiens ChaC, cation transport regulator homolog 1(E. coli) (CHAC1)                 |
| C8orf4    | 29.718      | NM_020130    | Homo sapiens chromosome 8 open reading frame 4 (C8orf4)                                  |
| LOC728114 | 27.240      | XR_040708    | PREDICTED: Homo sapiens hypothetical protein LOC728114 (LOC728114)                       |
| DNAI2     | 24.667      | NM_023036    | Homo sapiens dynein, axonemal, intermediate chain 2 (DNAI2)                              |
| GBP2      | 22.082      | NM_004120    | Homo sapiens guanylate binding protein 2, interferon-inducible (GBP2)                    |

The genome-wide gene expression profile was studied on whole human genome SurePrint G3 arrays array in Detroit 562 cells following a 4 hour-exposure to vehicle (DMSO) or to the CuE 1.25  $\mu$  M. The fold changes greater than 2 or smaller than 0.5 calculated by the expression levels in the CuE treated cells divided by those in the vehicle-treated cells, were considered a substantial up- or down- regulation. Top ten of them are listed with gene symbol, gene name, and fold change.
